# Supplementary material
Source: PubMed Central journal article supplement (PMC5675020)
Supplement: NIHMS892797-supplement-Supplemental_Text.pdf [file NIHMS892797-supplement-Supplemental_Text.pdf]

```

macro "LN Reporter Regions"
{
//Draw 4 sets of ROI's and place them in the same folder as the image.
//set GFP and RFP thresholds by the negative image

var thresholdGFP = 16;
var thresholdRFP = 23;
var thresholdPE = 4;
var thresholdF480 = 32;

    //get image attributes
    name = getInfo("image.filename");
    original = getImageID();
    originalTitle = getTitle();

    //Set the directory where files will be pulled from and saved to
    OpenDir=getDirectory("Choose the folder where data will be pulled
from");
    DataDir=getDirectory("Choose the folder where data will be saved");
    //convert to 32 bit
    run("32-bit");

    // split channels and threshold the GFP and RFP images.
    //If GFP=0, the ratio image will be 0, and will become NaN during
background/NaN step
    //If RFP=0, the ratio will be x/0, which should return NaN, due to
Misc options
    run("Duplicate...", "title=GFPimage duplicate channels=1");
    GFPImage = getImageID();
    GFPImageTitle = getTitle();
    changeValues(0, thresholdGFP, 0)
    selectImage(original);
    run("Duplicate...", "title=RFPimage duplicate channels=2");
    RFPImage = getImageID();
    RFPImageTitle = getTitle();
    changeValues(0, thresholdRFP, 0)

    // divide GFPImage by RFPImage
    run("Misc...", "divide=NaN");
    imageCalculator("Divide create 32-bit", GFPImage, RFPImage);
    rename("RatioImage");
    RatioImage = getImageID();
    RatioImageTitle = getTitle();

    // generation of membrane mask
    selectImage(original);
    run("Duplicate...", "title=PE duplicate channels=3");
    //run("Median...", "radius=1.0");
    setThreshold(thresholdPE, 255);
    run("Convert to Mask", " black");
    PEImage = getImageID();
    rename("MemMaskImage")
    //to make the mask values either 1 or 0.
    run("Divide...", "value=255.000000000");
    MemMaskImage = getImageID();

```

```

MemMaskTitle = getTitle();

// calculate RFP to GFP ratio on membrane.
imageCalculator("Multiply create 32-bit", RatioImage, MemMaskImage);
setThreshold(0.0001, 255.0000);
run("NaN Background");
rename(originalTitle + "MemRatio");
MemRatioImage = getImageID();
MemRatioTitle = getTitle();
run("Fire");
saveAs("Tiff", DataDir+MemRatioTitle+".tif");
setMinAndMax(0.0000, 4.000);
// cleanup and select results table
//selectImage(original); close();
selectImage(RFPImage); close();
selectImage(GFPImage); close();
//selectImage(RatioImage); close();

//Ratio measurements
run("Set Measurements...", "area mean display redirect=None decimal=3");
roiManager("Reset");
open(OpenDir + "RoiSetMed.zip");
ROICountMed=roiManager("Count");//=3
for (i=0; i<ROICountMed; i++) {
    roiManager("Select",i);
    roiManager("Rename", "Med");
}
//roiManager("Reset");
open(OpenDir + "RoiSetMedL.zip");
ROICountMedL=roiManager("Count");
for (i=ROICountMed; i<ROICountMedL; i++) {
    roiManager("Select",i);
    roiManager("Rename", "MedL");
}
//roiManager("Measure");
//roiManager("Reset");
open(OpenDir + "RoiSetT.zip");
ROICountT=roiManager("Count")
for (i=ROICountMedL; i<ROICountT; i++) {
    roiManager("Select",i);
    roiManager("Rename", "T");
}
open(OpenDir + "RoiSetSCS.zip");
ROICountSCS=roiManager("Count")
for (i=ROICountT; i<ROICountSCS; i++) {
    roiManager("Select",i);
    roiManager("Rename", "SCS");
}
roiManager("Deselect");
roiManager("Measure");
// save the results table as an excel file
//Adding the settings to the results table:
i = nResults; // variable for counting, initialising with 0
setResult("Image name", i, originalTitle);

```

```
        setResult("thresholdGFP", i, thresholdGFP); // add a "Label" column
to the results table and name the entry "point1"
        setResult("thresholdRFP", i, thresholdRFP);
        setResult("thresholdPE", i, thresholdPE);
        setResult("thresholdF480", i, thresholdF480);
        selectWindow("Results");
        saveAs("Results", DataDir + originalTitle + ".xls");
    }
```

```

macro "LN Reporter transduced primary T cells"
{
var thresholdGFP = 5;
var thresholdRFP = 30;
var thresholdPE = 12;

    //get image attributes
    name = getInfo("image.filename");
    original = getImageID();
    originalTitle = getTitle();
    shortTitle= substring(originalTitle, 0,11)
    CellROI="Cells " + substring(originalTitle, 0,11) + ".zip";
    MedROI="MedROI.zip";
    TROIs="TROI.zip";
    TROI="TROI.zip";
    //Set the directory where files will be pulled from and saved to
    OpenDir=getDirectory("Choose the folder where data will be pulled
from");
    DataDir=getDirectory("Choose the folder where data will be saved");
    //convert to 32 bit
    run("32-bit");

    //split channels and threshold the GFP and RFP images.
    //If GFP=0, the ratio image will be 0, and will become NaN during
background-->NaN
    //If RFP=0, the ratio will be x/0, which should return NaN, as set
in Misc options
    run("Duplicate...", "title=GFPimage duplicate channels=1");
    GFPImage = getImageID();
    GFPImageTitle = getTitle();
    changeValues(0, thresholdGFP, 0)
    selectImage(original);
    run("Duplicate...", "title=RFPimage duplicate channels=2");
    RFPImage = getImageID();
    RFPImageTitle = getTitle();
    changeValues(0, thresholdRFP, 0)

    // divide image1 by image2
    run("Misc...", "divide=NaN");
    imageCalculator("Divide create 32-bit", GFPImage, RFPImage);
    rename("RatioImage");
    RatioImage = getImageID();
    RatioImageTitle = getTitle();

    // generation of membrane mask
    //Mask the PE
    selectImage(original);
    run("Duplicate...", "title=PE duplicate channels=3");
    run("Median...", "radius=.5");
    setThreshold(thresholdPE, 255);
    run("Convert to Mask", " black");
    PEImage = getImageID();
    rename("MemMaskImage")
    //to make the mask values either 1 or 0.

```

```

run("Divide...", "value=255.000000000");
MemMaskImage = getImageID();
MemMaskTitle = getTitle();

// calculate RFP to GFP ratio on membrane.
imageCalculator("Multiply create 32-bit", RatioImage, MemMaskImage);
//run("Threshold...");
setThreshold(0.0001, 255.0000);
run("NaN Background");
rename(originalTitle + "MemRatio");
MemRatioImage = getImageID();
MemRatioTitle = getTitle();
run("Fire");
setMinAndMax(0.0000, 1.000);
saveAs("Tiff", DataDir+MemRatioTitle+".tif");
roiManager("Reset");
if (File.exists(OpenDir + CellROI) == 1) x=x;
else {
setTool("rectangle");
waitForUser("Draw the T cell ROIs as small as possible");
roiManager("Save", DataDir + CellROI);
}

if (File.exists(OpenDir + MedROI) == 1) x = x;
else {
roiManager("Reset");
setTool("polygon");
waitForUser("Draw the Medulla ROIs and add to manager");
ROICount=roiManager("Count");//=3
for (i=0; i<ROICount; i++) {
roiManager("Select",i);
roiManager("Rename", "Med"); }
roiManager("Save", DataDir + MedROI);
}
//here, open all the ROIs, which are named properly now. Then open
the T zone ROI.
if (File.exists(OpenDir + TROIs) == 1 || File.exists(OpenDir +
TROI)) x = x;
else {
roiManager("Reset");
setTool("polygon");
waitForUser("Draw the T zone ROIs and add to manager");
ROICount=roiManager("Count");//=3
for (i=0; i<ROICount; i++) {
roiManager("Select",i);
roiManager("Rename", "T"); }
roiManager("Save", DataDir + TROI);
}

//generate a single ROI from all the TROIs
roiManager("Reset");
open(DataDir + TROIs);
ROICount=roiManager("Count");
roiManager("Deselect");
roiManager("Combine");
roiManager("Add");

```

```

roiManager("Select",ROICount);
roiManager("Rename", "Whole T");
a1 = newArray(ROICount);
for (i=0; i<a1.length; i++)
    a1[i] = i;
roiManager("select", a1);
roiManager("Delete");
//rename the cells that have a centroid inside the T zone
open(DataDir + CellROI);
ROICount=roiManager("Count");
CellStart=1;
CellEnd=ROICount-1;
for (i=1; i<ROICount; i++) {
    roiManager("select", i);
    Roi.getBounds(x, y, width, height);
    a= x+width/2;
    b= y+height/2;
    roiManager("select", 0);
    if (Roi.contains(a,b)==1) {
        roiManager("Select", i);
        roiManager("Rename", "T zone cell");
    }
}
//open the medulla ROIs and generate a single ROI.
ROICount1=roiManager("Count"); //9
open(DataDir + MedROI);
ROICount2=roiManager("Count"); //11
array = Array.getSequence(ROICount2);
Selection=Array.slice(array,ROICount1,ROICount2);
roiManager("select", Selection);
roiManager("Combine");
roiManager("Add");
roiManager("Select",ROICount2);
roiManager("Rename", "Whole Med");
//rename the cells that have a centroid inside the medulla
for (i=1; i<ROICount; i++) {
    roiManager("select", i);
    Roi.getBounds(x, y, width, height);
    a= x+width/2;
    b= y+height/2;
    roiManager("select", ROICount2);
    if (Roi.contains(a,b)==1) {
        roiManager("Select", i);
        roiManager("Rename", "Med cell");
    }
}
ROICountTotal=roiManager("Count"); //11
arrayTotal = Array.getSequence(ROICountTotal);
SelectionFinal=Array.slice(arrayTotal,ROICount,ROICountTotal);
selectWindow(MemRatioTitle+".tif");
roiManager("select", SelectionFinal);
roiManager("Delete");
roiManager("select", 0); //deleting the T zone ROI
roiManager("Delete");
//Measure the cell ratios

```

```
        run("Set Measurements...", "area mean display redirect=None
decimal=3");
        roiManager("Deselect");
        roiManager("Measure");

        i = nResults;    // variable for counting, initialising with 0
        setResult("Image name", i, originalTitle);
        setResult("thresholdGFP", i, thresholdGFP); // add a "Label" column
to the results table and name the entry "point1"
        setResult("thresholdRFP", i, thresholdRFP);
        setResult("thresholdPE", i, thresholdPE);
        selectWindow("Results");
        saveAs("Results", DataDir + shortTitle + ".xls");
    }

}
```
